# Supplementary material for: Evaluating early detection of grapevine trunk diseases from asymptomatic leaves based on hyperspectral imagery
Source: Research Square preprint supplement (doi:10.21203/rs.3.rs-6463219/v1), 2025-05-07
Supplement: Supplementary file 1 [file 010da5b610c89e95b3ea1f90.docx]

**Additional file 2.** Vegetation indices that were compared among inoculation treatments (controls and plants inoculated with *N*. *parvum*, *P*. *chlamydospora*, or *T*. *texanus*), at weeks 8, 9, and 14.

| Vegetation index | Equation | | Description | | Reference | |
| --- | --- | --- | --- | --- | --- | --- |
| Structural indices | |  | |  | |  | |
| Enhanced Vegetation Index | EVI = [2.5 x (R800 – R670)] / [(R800 + 6) (R670 – 7.5) (R800 + 1)] | | Responsive to canopy structural variations, including leaf area, canopy type, plant physiognomy, and canopy architecture. | | [1] | |
| Modified Chlorophyll Absorption Index | MCARI = [(R700 – R670) – 0.2 (R700 – R550)] x (R700 – R670) | | Measures depth of chlorophyll absorption. | | [2] | |
| Modified Soil-Adjusted Vegetation Index | MSAVI = 2 x R800 + 1 – √(2 x 𝑅800 + 1) 2 − 8(𝑅800 − 𝑅670) /2 | | Measures depth of chlorophyll absorption, when bare soil is visible between leaves. | | [3] | |
| Modified Triangular Vegetation Index 1 | MTVI1= 1.2 [1.2 (R800 – R550) – 2.5 (R670 – R550)] | | Measures crop growth and yield. | | [4] | |
| Normalized Difference Red Edge | NDRE = (R800 – R720) / (R800 + R720) | | Measures canopy health and vigor. Has been investigated in *Vitis vinifera* with symptoms of Esca. | | [5, 6] | |
| Normalized Difference Vegetation Index | NDVI = (R800 - R670) / (R800 + R670) | | Measures canopy health and vigor. | | [5, 6] | |
| Optimized Soil-Adjusted Vegetation Index | OSAVI = [(1 + 0.16) (R800 – R670)] / (R800 – R670 + 0.16) | | Accounts for soil optical properties, to minimize the effect of reflectance from soil. | | [7] | |
| Renormalized Difference Vegetation Index | RDVI = (R800 – R670) / √(R800 – R670) | | Ratio of light absorbed in the near-infrared spectrum, to light absorbed in the red range of the visible spectrum. | | [8] | |
| Simple Ratio | SR = R800 / R670 | | Minimizes the effect of reflectance from soil, ice, and water. | | [9] | |
| Pigment indices |  | |  | |  | |
| Gitelson & Merzlyak Index 1 | GM1 = R750 / R550 | | Measures chlorophyll content in leaves. | | [10, 11] | |
| Gitelson & Merzlyak Index 2 | GM2 = R750 / R700 | | Measures chlorophyll content in leaves. | | [10, 11] | |
| Chlorophyll Index Red Edge | CI = R750 / R710 | | Measures chlorophyll a and chlorophyll b content in leaves, to detect chlorosis. | | [12] | |
| Normalized Phaeophytinization Index | NPQI = (R415 – R435) / (R415 + R435) | | Measures chlorophyll degradation, as a phaeophytinization-based spectral trait. | | [13, 14] | |
| Carotenoid Reflectance Index 550 | CRI550 = (1 / R510) – (1 / R550) | | Measures the physiological state of plants during development, senescence, acclimation/ adaptation to different environments, and various stresses. | | [15] | |
| Carotenoid Reflectance Index 700 | CRI700 = (1 / R510) – (1 / R700) | | Measures carotenoid reflectance. | | [15] | |
| Pigment Specific Simple Ratio Chlorophyll a | PSSRa = R800 – R675 | | Measures light absorption and photosynthesis. | | [16, 17] | |
| Pigment Specific Simple Ratio Chlorophyll b | PSSRb = R800 – R650 | | Measures the physiological state of plants during development, senescence, and various stresses. | | [16, 17] | |
| Pigment Specific Simple Ratio Carotenoid | PSSRc = R800 – R500 | | Measures chlorophyll content in leaves, under infection by necrotrophic pathogens. | | [16, 17] | |
| Pigment Specific Normalized Difference | PSNDc = (R800 – R470) / (R800 + R470) | | Measures carotenoid concentration in leaves at different stages of senescence. | | [18, 19] | |
| Xanthophyll indices |  | |  | |  | |
| Photochemical Reflectance Index 570 | PRI570 = (R570 – R531) / (R570 + R531) | | Measures photoprotective pigments. Has been investigated in *Vitis vinifera* infested by *Phylloxera*, the feeding of which is associated with lower leaf chlorophyll content, compared to the leaves of uninfested vines. | | [14, 20] | |
| Photochemical Reflectance Index 515 | PRI515 = (R515 – R531) / (R515 + R531) | | Measures light-use efficiency. | | [14, 20] | |
| Photochemical Reflectance Index 512 | PRI512 = (R512 – R531) / (R512 + R531) | | Measures diurnal changes in photosynthesis. | | [14, 20] | |
| R/G/B indices |  | |  | |  | |
| Redness Index | R = R700 / R670 | | Measures chlorophyll concentration. | | [21] | |
| Greenness Index | G = R570 / R670 | | Measures chlorophyll concentration. | | [22] | |
| Blue Index | B = R450 / R490 | | Measures anthocyanin concentrations. | | [22] | |
| Lichtenthaler Index | LIC1= (R800 – R680) / (R800 + R680) | | Measures damage to photosynthesis. | | [23] | |
| Chlorophyll index |  | |  | |  | |
| Reflectance Curvature Index | CUR = (R675 x R690) / R2683 | | Measures changes in steady-state fluorescence between stressed and non-stressed plants. | | [12] | |
| Plant disease index |  | |  | |  | |
| Healthy Index | HI = (R534 – R698) / (R534 + R698) – ½ x R704 | | Classifies healthy and disease plants. | | [24] | |

**References**

1. Huete A, Didan K, Miura T, Rodriguez EP, Gao X, et al. Overview of the radiometric and biophysical performance of the MODIS vegetation indices. Remote Sens Env. 2002;83:195-213. <https://doi.org/10.1016/S0034-4257(02)00096-2>.

2. Daughtry CS, Walthall C, Kim M, De Colstoun EB, McMurtrey Iii J. Estimating corn leaf chlorophyll concentration from leaf and canopy reflectance. Remote Sens Env. 2000;74:229-39. <https://doi.org/10.1016/S0034-4257(00)00113-9>.

3. Qi J, Chehbouni A, Huete AR, Kerr YH, Sorooshian S. A modified soil adjusted vegetation index. Remote Sens Env. 1994;48:119-26. <https://doi.org/10.1016/0034-4257(94)90134-1>.

4. Haboudane D, Miller JR, Pattey E, Zarco-Tejada PJ, Strachan IB. Hyperspectral vegetation indices and novel algorithms for predicting green LAI of crop canopies: Modeling and validation in the context of precision agriculture. Remote Sens Env. 2004;90:337-52. <https://doi.org/10.1016/j.rse.2003.12.013>.

5. D’Auria D, Ristorto G, Persia F, Vidoni R, Mazzetto F. Development and preliminary tests of a crop monitoring mobile lab based on a combined use of optical sensors. Int J Comput Software Eng. 2016;IJCSE:103. <https://doi.org/10.15344/2456-4451/2016/103>.

6. Daglio G, Cesaro P, Todeschini V, Lingua G, Lazzari M, et al. Potential field detection of Flavescence dorée and Esca diseases using a ground sensing optical system. Biosys Eng. 2022;215:203-14. <https://doi.org/10.1016/j.biosystemseng.2022.01.009>.

7. Rondeaux G, Steven M, Baret F. Optimization of soil-adjusted vegetation indices. Remote Sens Env. 1996;55:95-107. <https://doi.org/10.1016/0034-4257(95)00186-7>.

8. Roujean J-L, Breon F-M. Estimating PAR absorbed by vegetation from bidirectional reflectance measurements. Remote Sens Env. 1995;51:375-84. <https://doi.org/10.1016/0034-4257(94)00114-3>.

9. Jordan CF. Derivation of leaf‐area index from quality of light on the forest floor. Ecology. 1969;50:663-66. <https://doi.org/10.2307/1936256>.

10. Gitelson AA, Kaufman YJ, Merzlyak MN. Use of a green channel in remote sensing of global vegetation from EOS-MODIS. Remote Sens Env. 1996;58:289-98. <https://doi.org/10.1016/S0034-4257(96)00072-7>.

11. Gitelson AA, Merzlyak MN. Remote estimation of chlorophyll content in higher plant leaves. Int J Remote Sens. 1997;18:2691-97. <https://doi.org/0071-1128/00/0055-121>.

12. Zarco-Tejada PJ, Berjón A, Lopez-Lozano R, Miller JR, Martín P, et al. Assessing vineyard condition with hyperspectral indices: Leaf and canopy reflectance simulation in a row-structured discontinuous canopy. Remote Sens Env. 2005;99:271-87. <https://doi.org/10.1016/j.rse.2005.09.002>.

13. Barnes JD, Balaguer L, Manrique E, Elvira S, Davison A. A reappraisal of the use of DMSO for the extraction and determination of chlorophylls a and b in lichens and higher plants. Environ Exp Botany. 1992;32:85-100. <https://doi.org/10.1016/0098-8472(92)90034-Y>.

14. Gamon J, Penuelas J, Field C. A narrow-waveband spectral index that tracks diurnal changes in photosynthetic efficiency. Remote Sens Env. 1992;41:35-44. <https://doi.org/10.1016/0034-4257(92)90059-S>.

15. Gitelson AA, Zur Y, Chivkunova OB, Merzlyak MN. Assessing carotenoid content in plant leaves with reflectance spectroscopy. Photochem Photobiol. 2002;75:272-81. <https://doi.org/10.1562/0031-8655(2002)0750272ACCIPL2.0.CO2>.

16. Junges AH, Ducati JR, Lampugnani CS, Almança MAK. Detection of grapevine leaf stripe disease symptoms by hyperspectral sensor. Phytopathol Mediterr. 2018;57:399-406. <https://doi.org/10.14601/Phytopathol_Mediterr-22862>.

17. Marín-Ortiz JC, Gutierrez-Toro N, Botero-Fernández V, Hoyos-Carvajal LM. Linking physiological parameters with visible/near-infrared leaf reflectance in the incubation period of vascular wilt disease. Saudi J Biol Sci. 2020;27:88-99. <https://doi.org/10.1016/j.sjbs.2019.05.007>.

18. Blackburn GA. Spectral indices for estimating photosynthetic pigment concentrations: A test using senescent tree leaves. Int J Remote Sens. 1998;19:657-75. <https://doi.org/10.1080/014311698215919>.

19. Blackburn GA. Quantifying chlorophylls and caroteniods at leaf and canopy scales: An evaluation of some hyperspectral approaches. Remote Sens Env. 1998;66:273-85. <https://doi.org/10.1016/S0034-4257(98)00059-5>.

20. Blanchfield AL, Robinson SA, Renzullo LJ, Powell KS. Phylloxera-infested grapevines have reduced chlorophyll and increased photoprotective pigment content—Can leaf pigment composition aid pest detection? Funct Plant Biol. 2006;33:507-14. <https://doi.org/10.1071/FP05315>.

21. Gitelson A, Yacobi Y, Schalles J, Rundquist D, Han L, et al. Remote estimation of phytoplankton density in productive waters. Adv Limnol. 2000;55:121-36. <https://doi.org/0071-1128/00/0055-121>.

22. Calderón R, Navas-Cortés JA, Lucena C, Zarco-Tejada PJ. High-resolution airborne hyperspectral and thermal imagery for early detection of *Verticillium* wilt of olive using fluorescence, temperature and narrow-band spectral indices. Remote Sens Env. 2013;139:231-45. <https://doi.org/10.1016/j.rse.2013.07.031>.

23. Lichtenthaler HK, Lang M, Sowinska M, Heisel F, Miehe J. Detection of vegetation stress via a new high resolution fluorescence imaging system. J Plant Phys. 1996;148:599-612. <https://doi.org/10.1016/S0176-1617(96)80081-2>.

24. Mahlein A-K, Rumpf T, Welke P, Dehne H-W, Plümer L, et al. Development of spectral indices for detecting and identifying plant diseases. Remote Sens Env. 2013;128:21-30. <https://doi.org/10.1016/j.rse.2012.09.019>.
